# Supplementary material for: Suppression of mRNA Nanoparticle Transfection in Human Fibroblasts by Selected Interferon Inhibiting Small Molecule Compounds
Source: PubMed Central journal article supplement (PMC5618237; doi:10.3390/biom7030056), 2017-07-31

# Supplementary Figure1. Histograms of relative GFP expression of BJ fibroblasts transfected with GFP mRNA following small molecules treatments.

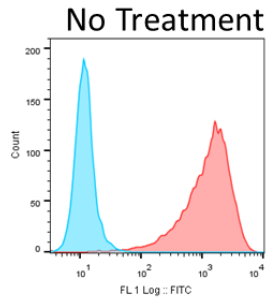

## Cardiac Glycosides

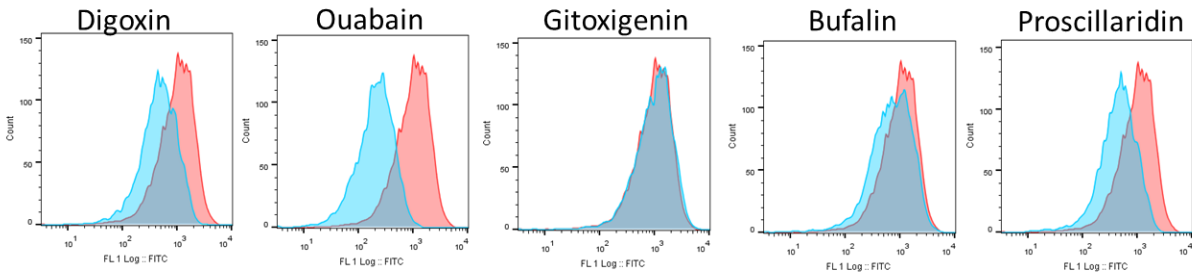

## Natural Compounds

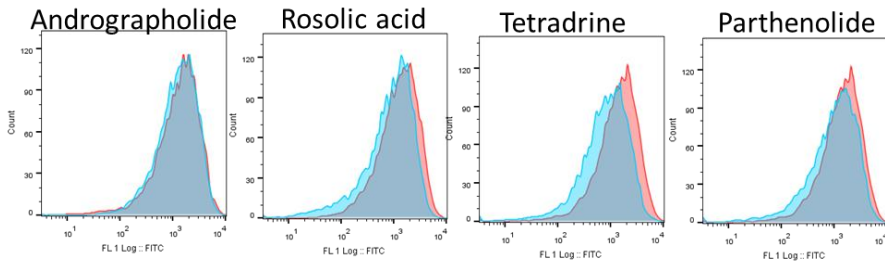

## Pathway inhibitors

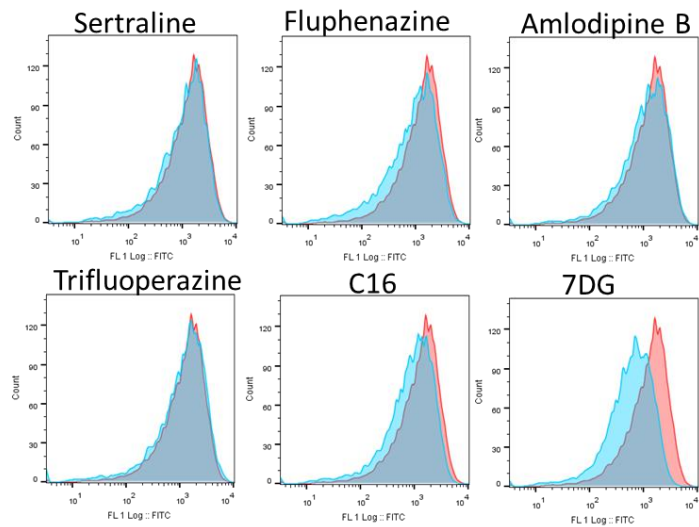

Supplement: biomolecules-07-00056-s001.pdf [file biomolecules-07-00056-s001.pdf]
